# Supplementary material for: Clinical Characteristics and Short-Term Outcomes of Pediatric Lymphoma: A Retrospective Cohort Study from a Large Tertiary Hospital in a Low- and Middle-Income Country
Source: Research Square preprint supplement (doi:10.21203/rs.3.rs-5539431/v1), 2025-04-10

**Clinical Characteristics and Short-Term Outcomes of Pediatric Lymphoma: A Retrospective Cohort Study from a Large Tertiary Hospital in a Low- and Middle-Income Country**

Dania Abuhalima 1*

Email: [dabuhalima@gmail.com](mailto:dabuhalima@gmail.com)

Dima Malhis 1

Email: [malhiss.dima@gmail.com](mailto:malhiss.dima@gmail.com)

Zeina Qadi 1

Email: [zeinaraedqadi@gmail.com](mailto:zeinaraedqadi@gmail.com)

Adham Abu Taha 2,3

Email: [aabutaha@najah.edu](mailto:aabutaha@najah.edu)

Sultan Mosleh 1,4*

Email: [sultan.mosleh@najah.edu](mailto:sultan.mosleh@najah.edu)

Sa’ed H. Zyoud 5,6,7

Email: [saedzyoud@najah.edu](mailto:saedzyoud@najah.edu)

1 Department of Medicine, College of Medicine and Health Sciences, An-Najah National University, Nablus 44839, Palestine

2Department of Biomedical Sciences, Faculty of Medicine and Health Sciences, An-Najah National University, Nablus 44839, Palestine

3Department of Pathology, An-Najah National University Hospital, Nablus 44839, Palestine

4 Department of Pediatric Oncology, An-Najah National University Hospital, Nablus 44839, Palestine

5 Department of Clinical and Community Pharmacy, College of Medicine and Health Sciences, An-Najah National University, Nablus 44839, Palestine

6 Poison Control and Drug Information Center (PCDIC), College of Medicine and Health Sciences, An-Najah National University, Nablus 44839, Palestine

7 Clinical Research Center, An-Najah National University Hospital, Nablus 44839, Palestine

***Corresponding authors****:** [sultan.mosleh@najah.edu](mailto:sultan.mosleh@najah.edu)**;** [dabuhalima@gmail.com](mailto:dabuhalima@gmail.com)

| Supplementary Table S1. Survival rates in association with demographic and clinical characteristics | | | | |
| --- | --- | --- | --- | --- |
|  | **N of patients** **N =75** | **N died (%** | **N survived (%)** | **P value** |
| Total lymphoma | 75 | 3 (4) | 72 (96) |  |
| *Lymphoma type* |  |  |  | **0.246*** |
| NH | 41 | 3 (4) | 38 (50.7) |  |
| H | 34 | 0 (0) | 34 (45.3) |  |
| *Gender* |  |  |  | **0.999*** |
| Male | 46 | 2 (2.7) | 44 (58.7) |  |
| Female | 29 | 1 (1.3) | 28 (37.3) |  |
| *Residence* |  |  |  | **0.999*** |
| West Bank | 42 | 2 (2.7) | 40 (53.3) |  |
| Gaza | 33 | 1 (1.3) | 32 (42.7) |  |
| *Presentation* |  |  |  | **0.492*** |
| Neck mass | 36 | 1 (1.3) | 35 (46.7) |  |
| Respiratory symptoms | 10 | 0 (0) | 10 (13.3) |  |
| GI manifestations | 16 | 1 (1.3) | 15 (20.0) |  |
| B symptoms | 5 | 0 (0) | 5 (6.7) |  |
| Others** | 7 | 1 (1.3) | 7 (9.3) |  |
| *Pathological diagnosis* |  |  |  | **0 .636*** |
| DLBCL | 5 | 0 (0) | 5 (6.7) |  |
| BL | 23 | 2 (2.7) | 21 (28.0) |  |
| Classical nodular sclerosing | 25 | 0 (0) | 25 (33.3) |  |
| Classical lymphocyte rich | 4 | 0 (0) | 4 (5.3) |  |
| Classical mixed cellularity | 4 | 0 (0) | 4 (5.3) |  |
| Nodular nonclassical | 1 | 0 (0) | 1(1.3) |  |
| *Stage early/advanced* |  |  |  | **0.999*** |
| Early < 3 | 36 | 1 (1.3) | 35 (46.7) |  |
| Advanced ≥ 3 | 39 | 2 (2.7) | 37 (49.3) |  |
| *B symptoms* |  |  |  | **0.246*** |
| No | 41 | 3 (4.0) | 38 (50.7) |  |
| yes | 34 | 0 (0) | 34 (45.3) |  |
| *BM involvement* |  |  |  | **0.999*** |
| no | 70 | 3 (4.0) | 67 (89.3) |  |
| yes | 5 | 0 (0) | 5 (6.7) |  |
| *LDH* |  |  |  | **0.802*** |
| Less than 320 | 38 | 1 (1.3) | 37 (49.3) |  |
| More than 320 | 18 | 1 (1.3) | 17 (22.7) |  |
| Not done | 19 | 1 (1.3) | 18 (24) |  |
| *Site* |  |  |  | **0.999*** |
| Head/neck | 28 | 1 (1.3) | 27 (36.0) |  |
| mediastinal | 15 | 0 (0) | 15 (20.0) |  |
| abdomen/pelvis | 15 | 1 (1.3) | 14 (18.7) |  |
| Generalized | 17 | 1 (1.3) | 16 (21.3) |  |
| *Stage* |  |  |  | **0.613*** |
| I | 6 | 0 (0) | 6 (8) |  |
| II | 30 | 1 (1.3) | 29 (38.7) |  |
| III | 30 | 1(1.3) | 29 (38.7) |  |
| IV | 9 | 1 (1.3) | 8 (10.7) |  |

*** Fisher’s exact test**

****Others:** encompassed diverse presentations, such as generalized edema, facial puffiness, back pain, headache, migratory arthralgia & erythema, scrotal swelling, periorbital swelling, tooth pain, jaw mass, snoring, hoarseness, and double vision.

| Supplementary Table S2. Event rate in association with demographic and clinical data | | | | |
| --- | --- | --- | --- | --- |
|  | **N of patients N =75** | **N event (death or relapse) (%)** | **N no events (%)** | **P value** |
| Total lymphoma | 75 | 12 (16) | 63 (84) |  |
| *Lymphoma type* |  |  |  | **0.999*** |
| NH | 41 | 7 (9.3) | 34 (45.3) |  |
| H | 34 | 5 (6.7) | 29 (38.7) |  |
| *Gender* |  |  |  | **0.195*** |
| Male | 46 | 5 (6.7) | 41 (54.7) |  |
| Female | 29 | 7 (9.3) | 22 (29.3) |  |
| *Residence* |  |  |  | **0.999*** |
| West Bank | 42 | 7 (9.3) | 35 (46.7) |  |
| Gaza | 33 | 5 (6.7) | 28 (37.3) |  |
| *Presentation* |  |  |  | **0.360*** |
| Neck mass | 36 | 4 (5.3) | 32 (42.7) |  |
| Respiratory symptoms | 10 | 2 (2.7) | 8 (10.7) |  |
| GI manifestations | 16 | 2 (2.7) | 14 (18.7) |  |
| B symptoms | 5 | 2 (2.7) | 3 (4.0) |  |
| Others** | 7 | 2 (2.7) | 6 (8) |  |
| *Pathological diagnosis* |  |  |  | **0.277*** |
| LL | 13 | 4 (5.3) | 9 (12.0) |  |
| DLBCL | 5 | 0 (0) | 5 (6.7) |  |
| BL | 23 | 3 (4.0) | 20 (26.7) |  |
| Classical nodular sclerosing | 25 | 4 (5.3) | 21 (28.0) |  |
| Classical lymphocyte rich | 4 | 0 (0) | 4 (5.3) |  |
| Classical mixed cellularity | 4 | 0 (0) | 4 (5.3) |  |
| Nodular nonclassical | 1 | 1 (1.3) | 0 |  |
| *Stage early/advanced* |  |  |  | **0.351*** |
| Early < 3 | 36 | 4 (5.3) | 32 (42.7) |  |
| Advanced ≥ 3 | 39 | 8 (10.7) | 31 (41.3) |  |
| *B symptoms* |  |  |  | **0.999*** |
| No | 41 | 7 (9.3) | 34 (45.3) |  |
| yes | 34 | 5 (6.7) | 29 (38.7) |  |
| *BM involvement* |  |  |  | **0.999*** |
| no | 70 | 11 (14.7) | 59 (78.7) |  |
| yes | 5 | 1 (1.3) | 4 (5.3) |  |
| *LDH* |  |  |  | **0.999*** |
| Less than 320 | 38 | 6 (8) | 32 (42.7) |  |
| More than 320 | 18 | 3 (4) | 15 (20) |  |
| Not done | 19 | 3 (4) | 16 (21.3) |  |
| *Site* |  |  |  | **0.251*** |
| Head/neck | 28 | 2 (2.7) | 26 (34.7) |  |
| mediastinal | 15 | 3 (4.0) | 12 (16.0) |  |
| abdomen/pelvis | 15 | 2 (2.7) | 13 (17.3) |  |
| Generalized | 17 | 5 (6.7) | 12 (16.0) |  |
| *Stage* |  |  |  | **0.434*** |
| I | 6 | 0 (0) | 6 (8) |  |
| II | 30 | 4 (5.3) | 26 (34.7) |  |
| III | 30 | 5 (6.7) | 25 (33.3) |  |
| IV | 9 | 3 (4.0) | 6 (8.0) |  |

*** Fisher’s exact test**

*** * Others:** encompassed diverse presentations, such as generalized edema, facial puffiness, back pain, headache, migratory arthralgia & erythema, scrotal swelling, periorbital swelling, tooth pain, jaw mass, snoring, hoarseness, and double vision.

**Supplementary Figure 1. Kaplan-Meier curve for Event-Free Survival (EFS) in Pediatric Lymphoma**


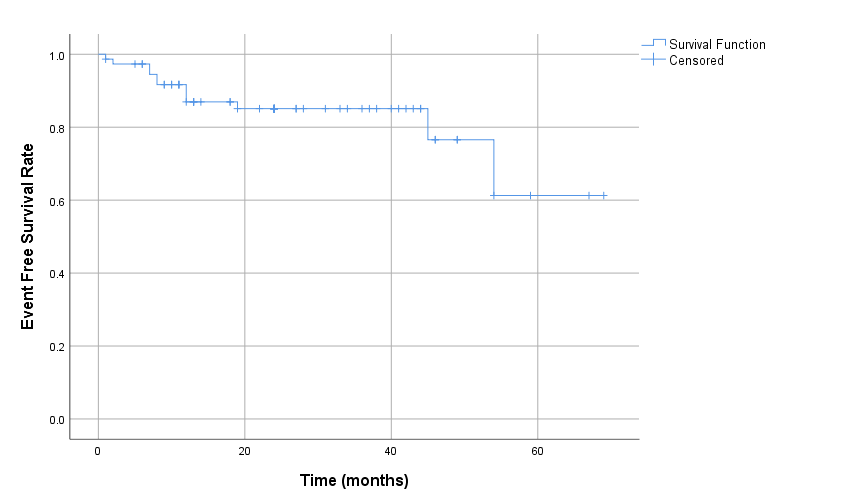


**Supplementary Figure 2. Kaplan-Meier curve for Overall Survival (OAS) in Pediatric Lymphoma**


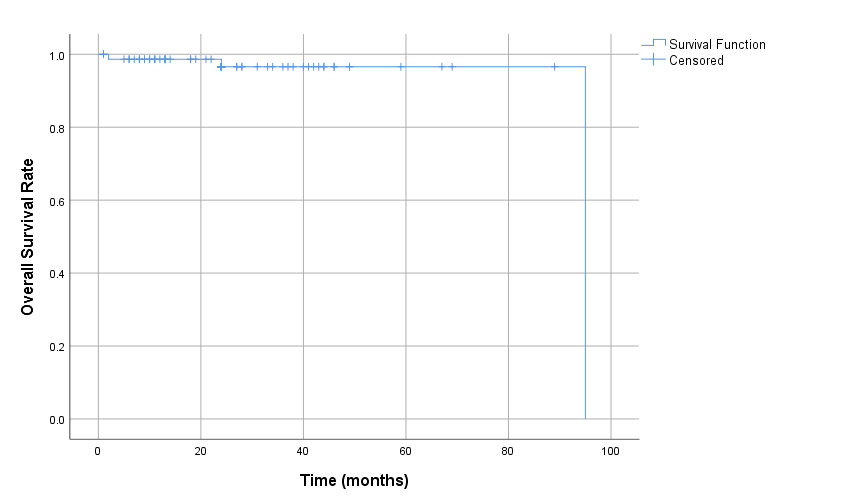

Supplement: Supplementary file 1 [file 9424758f93f37075f4bdc27e.docx]
